# Supplementary material for: Metabolic Profiling of Retrograde Pathway Transcription Factors Rtg1 and Rtg3 Knockout Yeast
Source: MDPI journal article supplement (doi:10.3390/metabo4030580), 2014-07-08
Supplement: s1 [file s1]

## Supplementary Information

**Figure S1.** Growth curve for BY4742, *rtg1* $\Delta$  and *rtg3* $\Delta$  under synthetic complete media ( $n = 3$ ). Metabolome sampling was done at 5, 9, 26 and 76 h.

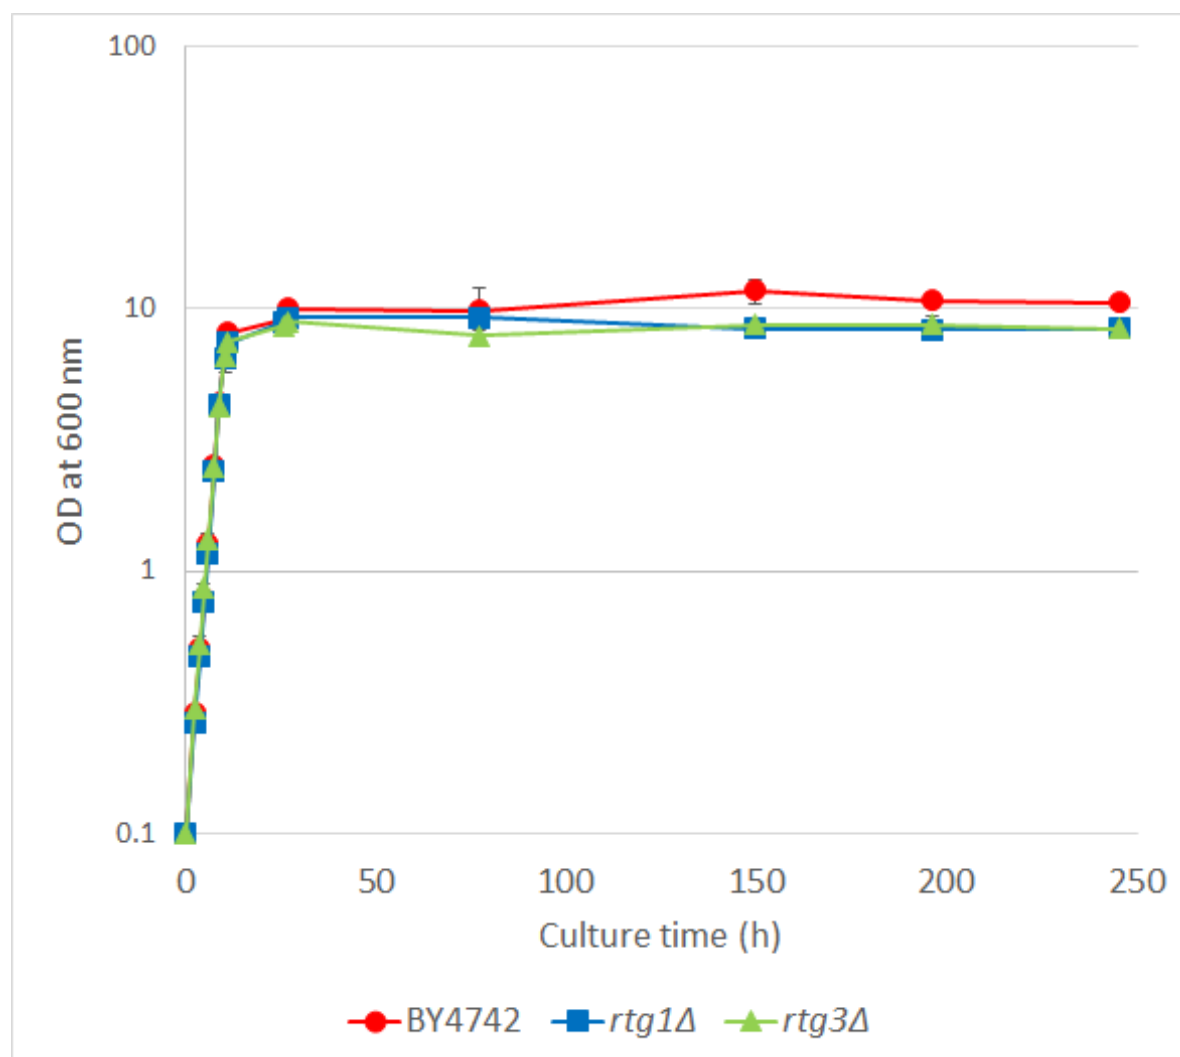

**Supplementary Table S1 (Excel file).** Raw data of metabolite intensities of BY4742, *rtg1* $\Delta$  and *rtg3* $\Delta$  strains. PIPES (1,4-piperazinediethanesulfonic acid) was used as an internal standard.

**Table S2.** Loading values on principal component 1 (PC1) and principal component 2 (PC2) for each metabolite (intracellular: from the yeast extract and extracellular: from the growth medium).

| Metabolite<br>(intracellular) | PC1<br>Loading | PC2<br>Loading | Metabolite<br>(extracellular) | PC1<br>Loading | PC2<br>Loading |
|-------------------------------|----------------|----------------|-------------------------------|----------------|----------------|
| 2-Isopropylmalate             | −0.00209       | 0.22745        | 2-Isopropylmalate             | −0.16400       | 0.07362        |
| 2-Oxoglutarate                | 0.00588        | 0.24828        | 2-Oxoglutarate                | −0.11752       | 0.05733        |
| 3Phosphoglycerate             | 0.11976        | 0.00749        | 4-Aminobutyrate               | −0.14398       | 0.14484        |
| 4-Aminobutyrate               | −0.11829       | 0.05978        | Adenine                       | 0.14294        | 0.18411        |
| Acetyl-coA                    | 0.13741        | 0.01074        | Adenosine                     | −0.12229       | 0.08622        |
| Adenine                       | 0.09936        | −0.04542       | a-Glycerophosphate            | −0.17368       | −0.02441       |
| Adenosine                     | −0.10064       | −0.03844       | Alanine                       | 0.11893        | −0.04041       |
| ADP                           | 0.09370        | 0.03354        | Amino adipic acid             | −0.15262       | 0.14734        |
| a-Glycerophosphate            | 0.13798        | −0.00768       | AMP                           | −0.15113       | 0.12424        |
| Alanine                       | 0.01347        | −0.06582       | Arginine                      | 0.14229        | 0.18760        |
| Amino adipic acid             | −0.07215       | 0.22560        | Asparagine                    | 0.15189        | 0.16691        |
| AMP                           | −0.10022       | −0.03836       | Aspartate                     | 0.14460        | 0.18242        |
| Arginine                      | 0.11712        | 0.08488        | Citrate                       | −0.13431       | 0.17177        |
| Asparagine                    | 0.10135        | −0.04259       | Cystine                       | 0.10505        | −0.10305       |
| Aspartate                     | 0.12016        | −0.06230       | Deoxyadenosine                | −0.17569       | 0.00762        |
| ATP                           | 0.13473        | 0.05739        | Deoxyguanosine                | −0.12206       | −0.18288       |
| b-Alanine                     | 0.02704        | 0.14669        | DHAP                          | −0.14678       | −0.07630       |
| Bisphosphoglycerate           | 0.11485        | 0.07410        | Glutamate                     | 0.13630        | 0.20084        |
| cAMP                          | 0.10106        | −0.13327       | Glutamine                     | 0.10919        | 0.22477        |
| CDP                           | 0.09910        | −0.02309       | Glutathione                   | −0.15461       | 0.13571        |
| Citrate                       | −0.07668       | 0.20449        | Glycine                       | 0.04117        | 0.05761        |
| Citrulline                    | 0.07007        | 0.07924        | Glycolate                     | −0.12834       | 0.16408        |
| CMP                           | −0.08741       | −0.08178       | Glyoxylate                    | −0.08650       | 0.18133        |
| CTP                           | 0.13086        | 0.05169        | Guanosine                     | −0.11670       | 0.07474        |
| Cysteine                      | −0.06774       | 0.21267        | Histidine                     | 0.16084        | 0.04404        |
| Cystine                       | 0.13480        | −0.02100       | Hypoxanthine                  | 0.13818        | 0.18256        |
| Cytidine                      | −0.07314       | 0.01314        | Inosine                       | −0.16559       | −0.02855       |
| Deoxyadenosine                | −0.08935       | 0.05245        | Isocitrate                    | −0.12434       | 0.17564        |
| Deoxycytidine                 | 0.07273        | −0.02977       | Leucine                       | 0.17279        | −0.06298       |
| Deoxyguanosine                | 0.10825        | −0.03625       | Lysine                        | 0.14266        | 0.18386        |
| DHAP                          | 0.13796        | −0.00388       | Malate                        | −0.17103       | 0.08345        |
| FAD                           | 0.11104        | 0.03701        | Methionine                    | 0.17403        | −0.04695       |
| Fructose                      |                |                |                               |                |                |
| 1,6-bisphosphate              | 0.13499        | −0.01370       | NAD                           | −0.14924       | 0.12477        |
| Fructose 1-phosphate          | 0.13737        | −0.01639       | Nicotinate                    | 0.14247        | 0.18098        |
| Fructose                      |                |                |                               |                |                |
| 2,6-bisphosphate              | 0.12608        | −0.00098       | Orotate                       | −0.15549       | −0.11610       |
| Fructose 6-phosphate          | 0.13058        | 0.03167        | Oxalacetate                   | 0.06816        | −0.15088       |
| Fumarate                      | 0.12440        | 0.07301        | Pantothenate                  | −0.00519       | 0.26084        |
| Glucose 6-phosphate           | 0.13294        | 0.04489        | Phenylalanine                 | 0.17340        | 0.02699        |
| Glutamate                     | 0.11327        | 0.07720        | Phosphoenolpyruvate           | −0.13665       | 0.16323        |

Table S2. Cont.

| Metabolite<br>(intracellular) | PC1<br>Loading | PC2<br>Loading | Metabolite<br>(extracellular) | PC1<br>Loading | PC2<br>Loading |
|-------------------------------|----------------|----------------|-------------------------------|----------------|----------------|
| Glutamine                     | 0.08882        | 0.13960        | Proline                       | −0.13749       | −0.02614       |
| Glutathione                   | 0.11373        | 0.10429        | Pyroglutamate                 | 0.03414        | −0.02368       |
| Glycerate                     | 0.08263        | 0.14066        | Pyruvate                      | 0.05378        | −0.24100       |
| Glycine                       | 0.08802        | 0.15103        | Serine                        | 0.15543        | 0.15707        |
| Glycolate                     | −0.04132       | 0.23183        | Succinate                     | −0.16794       | 0.08129        |
| Glyoxylate                    | 0.00639        | 0.24135        | Threonine                     | 0.11451        | 0.22466        |
| GMP                           | −0.08884       | −0.07027       | Thymidine                     | −0.17320       | 0.04120        |
| GTP                           | 0.13770        | 0.00852        | Trehalose                     | 0.14937        | −0.02877       |
| Guanine                       | 0.07134        | 0.00928        | Tryptophan                    | 0.15976        | −0.13349       |
| Guanosine                     | −0.06730       | 0.00043        | Tyrosine                      | 0.13203        | 0.15300        |
| Histidine                     | −0.02338       | 0.23441        | Uracil                        | 0.07631        | 0.17593        |
| Homoserine                    | 0.10027        | −0.05115       | Uridine                       | −0.15427       | 0.09296        |
| Hydroxyproline                | 0.09716        | 0.06096        | Valine                        | 0.02936        | 0.07420        |
| Hypoxanthine                  | 0.09569        | −0.02078       | Xanthine                      | −0.16286       | 0.10989        |
| Inosine                       | 0.09335        | 0.00044        |                               |                |                |
| Isocitrate                    | −0.06356       | 0.22648        |                               |                |                |
| Isoleucine                    | 0.12724        | −0.02595       |                               |                |                |
| Leucine                       | 0.12801        | −0.04393       |                               |                |                |
| Lysine                        | 0.11374        | −0.04160       |                               |                |                |
| Malate                        | 0.01816        | 0.22764        |                               |                |                |
| Methionine                    | 0.12383        | −0.05087       |                               |                |                |
| NAD                           | 0.09416        | 0.05793        |                               |                |                |
| NADH                          | 0.12883        | 0.01969        |                               |                |                |
| NADP                          | 0.09754        | 0.03847        |                               |                |                |
| NADPH                         | 0.13540        | 0.02288        |                               |                |                |
| Nicotinate                    | 0.09883        | −0.04632       |                               |                |                |
| Ornithine                     | −0.03392       | −0.12659       |                               |                |                |
| Orotate                       | 0.05678        | 0.13618        |                               |                |                |
| Oxalacetate                   | 0.12304        | −0.02171       |                               |                |                |
| Pantothenate                  | 0.09640        | 0.01449        |                               |                |                |
| Phenylalanine                 | 0.13560        | −0.04245       |                               |                |                |
| Phosphoenolpyruvate           | 0.12118        | 0.03853        |                               |                |                |
| Proline                       | −0.04735       | −0.11264       |                               |                |                |
| Putrescine                    | 0.02963        | −0.16010       |                               |                |                |
| Pyroglutamate                 | 0.13187        | 0.04943        |                               |                |                |
| Pyruvate                      | 0.12589        | −0.04248       |                               |                |                |
| Ribose 5-phosphate            | 0.11655        | 0.05339        |                               |                |                |
| Ribulose 5-phosphate          | 0.12525        | 0.04431        |                               |                |                |
| S-Adenosylmethionine          | −0.10702       | 0.05528        |                               |                |                |
| Sedoheptulose<br>7-phosphate  | 0.13532        | 0.02000        |                               |                |                |
| Serine                        | 0.11174        | −0.02229       |                               |                |                |
| Spermidine                    | −0.06151       | −0.08182       |                               |                |                |
| Succinate                     | −0.08868       | 0.17453        |                               |                |                |

Table S2. Cont.

| Metabolite<br>(intracellular) | PC1<br>Loading | PC2<br>Loading | Metabolite<br>(extracellular) | PC1<br>Loading | PC2<br>Loading |
|-------------------------------|----------------|----------------|-------------------------------|----------------|----------------|
| Threonine                     | 0.05368        | −0.12654       |                               |                |                |
| Thymidine                     | −0.12763       | 0.06990        |                               |                |                |
| TMP                           | −0.08416       | −0.04919       |                               |                |                |
| Trehalose                     | −0.06462       | 0.16862        |                               |                |                |
| Tryptophan                    | 0.12819        | −0.08465       |                               |                |                |
| Tyrosine                      | 0.10120        | 0.02960        |                               |                |                |
| UDP                           | 0.01583        | 0.04811        |                               |                |                |
| UDP-glucose                   | 0.08317        | 0.17915        |                               |                |                |
| UMP                           | −0.10538       | −0.05556       |                               |                |                |
| Uracil                        | 0.12805        | −0.01441       |                               |                |                |
| Uridine                       | −0.10055       | 0.07235        |                               |                |                |
| UTP                           | 0.13373        | 0.03512        |                               |                |                |
| Valine                        | 0.10324        | 0.10526        |                               |                |                |
| Xanthine                      | −0.10614       | 0.15427        |                               |                |                |

Table S3. Pathway analysis using MetaboAnalyst 2.0 (hits  $\geq 2$ , arranged according to *p*-values).

| Pathway Name                                | Total | Hits | p        | −log (p) | Holm p   | FDR      | Impact  |
|---------------------------------------------|-------|------|----------|----------|----------|----------|---------|
| Arginine and proline metabolism             | 37    | 13   | 2.37E-08 | 17.556   | 1.54E-06 | 1.54E-06 | 0.57168 |
| Alanine, aspartate and glutamate metabolism | 20    | 8    | 5.69E-06 | 12.077   | 0.000364 | 0.000185 | 0.87254 |
| Aminoacyl-tRNA biosynthesis                 | 67    | 13   | 4.65E-05 | 9.9767   | 0.002928 | 0.001007 | 0       |
| Glutathione metabolism                      | 23    | 7    | 0.000182 | 8.6137   | 0.011259 | 0.002951 | 0.63277 |
| Citrate cycle (TCA cycle)                   | 20    | 6    | 0.000608 | 7.4058   | 0.03707  | 0.006591 | 0.30939 |
| Nitrogen metabolism                         | 8     | 4    | 0.000608 | 7.4047   | 0.03707  | 0.006591 | 0       |
| Glyoxylate and dicarboxylate metabolism     | 14    | 5    | 0.000747 | 7.1989   | 0.044096 | 0.00694  | 0.48551 |
| Glycine, serine and threonine metabolism    | 26    | 6    | 0.00275  | 5.8963   | 0.15948  | 0.022342 | 0.41988 |
| beta-Alanine metabolism                     | 7     | 3    | 0.005565 | 5.1912   | 0.31722  | 0.040194 | 1       |
| Pyrimidine metabolism                       | 35    | 6    | 0.012898 | 4.3507   | 0.72228  | 0.083836 | 0.25014 |
| Lysine biosynthesis                         | 19    | 4    | 0.020822 | 3.8717   | 1        | 0.12304  | 0.125   |
| Cysteine and methionine metabolism          | 33    | 5    | 0.037927 | 3.2721   | 1        | 0.20544  | 0.31009 |
| Purine metabolism                           | 60    | 7    | 0.053069 | 2.9362   | 1        | 0.26535  | 0.07859 |
| Butanoate metabolism                        | 17    | 3    | 0.071451 | 2.6387   | 1        | 0.33174  | 0.28571 |
| Cyanoamino acid metabolism                  | 10    | 2    | 0.11148  | 2.1939   | 1        | 0.48308  | 0       |
| Valine, leucine and isoleucine biosynthesis | 24    | 3    | 0.16013  | 1.8318   | 1        | 0.65052  | 0.07519 |
| Sulfur metabolism                           | 13    | 2    | 0.17308  | 1.754    | 1        | 0.66178  | 0.05319 |
| Propanoate metabolism                       | 14    | 2    | 0.19472  | 1.6362   | 1        | 0.70314  | 0       |
| Pantothenate and CoA biosynthesis           | 16    | 2    | 0.23889  | 1.4318   | 1        | 0.81724  | 0       |
| Starch and sucrose metabolism               | 18    | 2    | 0.28357  | 1.2603   | 1        | 0.92162  | 0.15497 |
| Porphyryn and chlorophyll metabolism        | 20    | 2    | 0.32811  | 1.1144   | 1        | 1        | 0       |
| Pyruvate metabolism                         | 23    | 2    | 0.39349  | 0.93271  | 1        | 1        | 0.1159  |

**Table S4.** Cell growth on YPD (1% yeast extract, 2% peptone, 2% dextrose, 2% agar (% w/v)) and YPG (1% yeast extract, 2% peptone, 2% glycerol, 2% agar (% w/v)) plates, expressed as the number of colonies. Cell cultures were diluted to approximately  $10^3$  cells/ mL, 100  $\mu$ L were spread on YPD or YPG plates, and the colony number was counted after 2-4 days. Measurement was done in duplicate (separated by a comma) for each sampling point.

| Strain               | Plate | Day 1   | Day 3    | Day 5  |
|----------------------|-------|---------|----------|--------|
| BY4742               | YPD   | 86, 115 | 100, 100 | 68, 53 |
|                      | YPG   | 81, 151 | 96, 112  | 66, 54 |
| <i>rtg1</i> $\Delta$ | YPD   | 53, 52  | 31, 34   | 25, 28 |
|                      | YPG   | 61, 62  | 39, 43   | 29, 28 |
| <i>rtg3</i> $\Delta$ | YPD   | 23, 16  | 27, 45   | 6, 8   |
|                      | YPG   | 28, 15  | 25, 40   | 10, 11 |

**Figure S2.** Intracellular (from cell extracts) and extracellular (from the growth medium) concentrations of glutamate and glutamine in BY4742, and *rtg1* $\Delta$  and *rtg3* $\Delta$  mutants ( $n = 3$ ). Y-axis indicates relative intensity while x-axis indicates time. The metabolite intensities were relative to that of BY4742 at time 5 h.

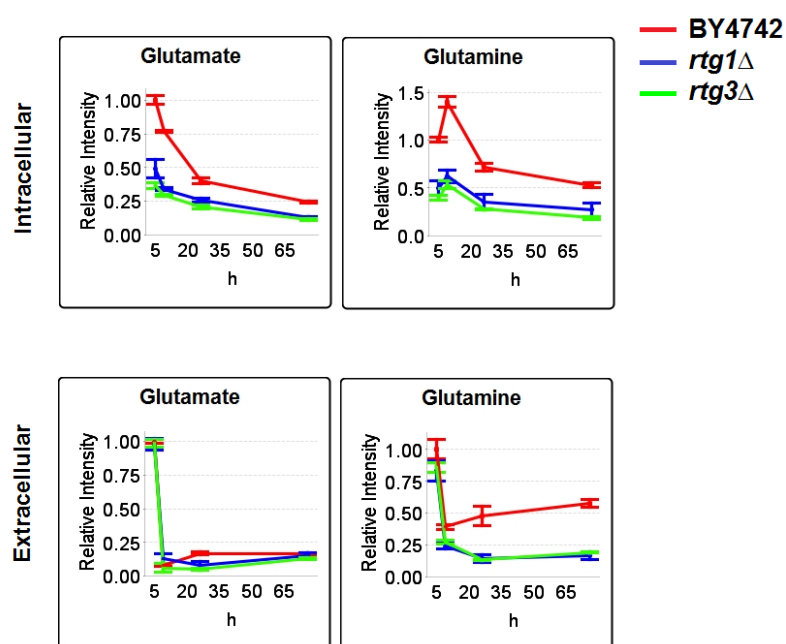

**Figure S3.** (A) PCA score plot for time-course extracellular metabolic profiling (from growth media) of wild type strain BY4742, and *rtg1* $\Delta$  and *rtg3* $\Delta$  mutants ( $n = 3$ ). The metabolites were scaled to unit variance. Ellipse indicate 95% confidence border based on Hotelling's  $T^2$ ; (B) The corresponding loading plot illustrating metabolites that contribute to the separation on PC1 and PC2 (see Supplementary Table S2 for the loading values).

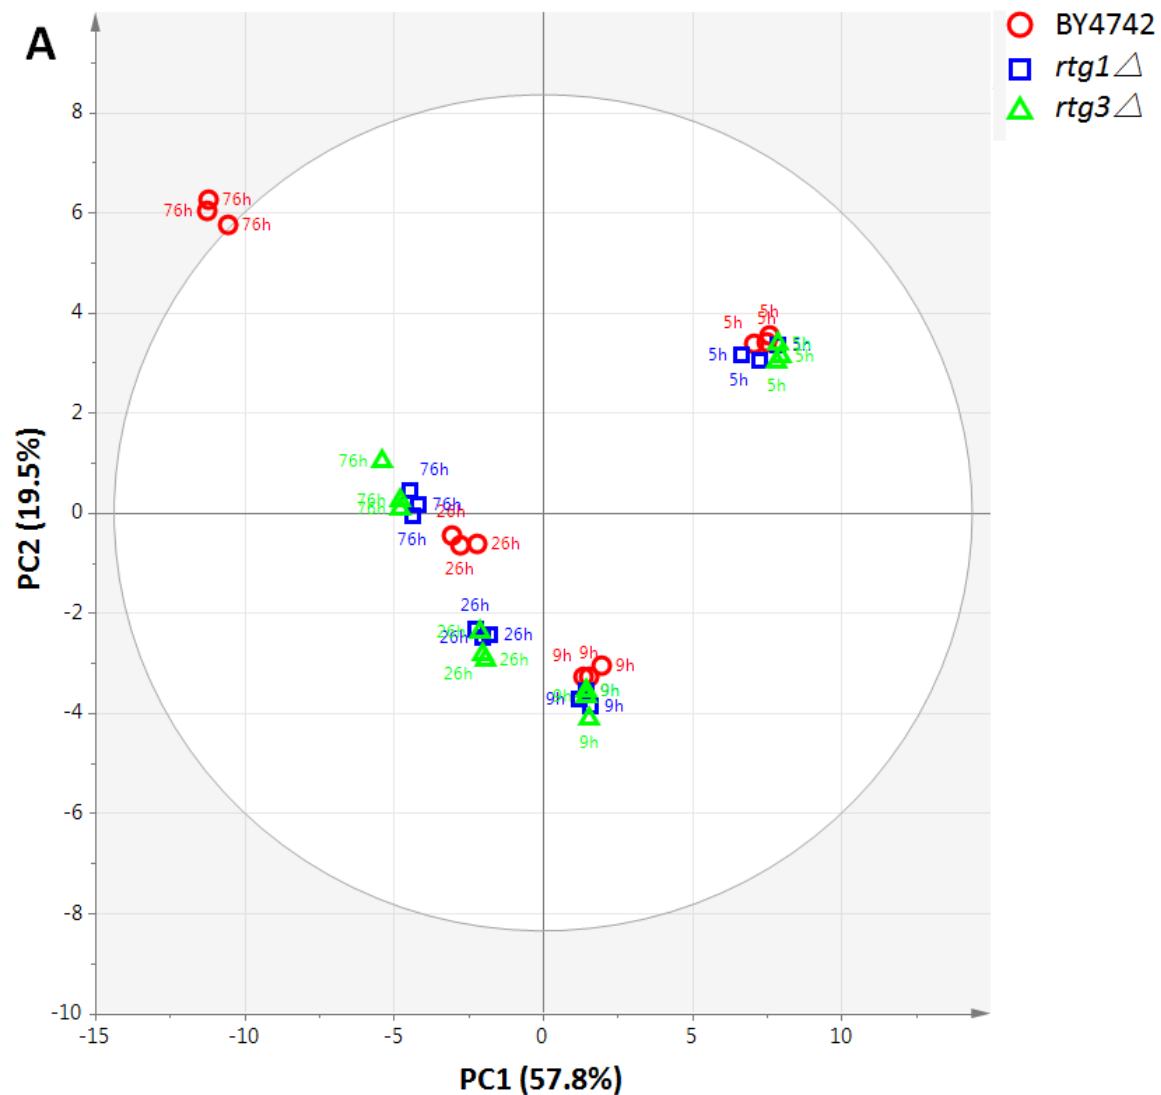

Figure S3. Cont.

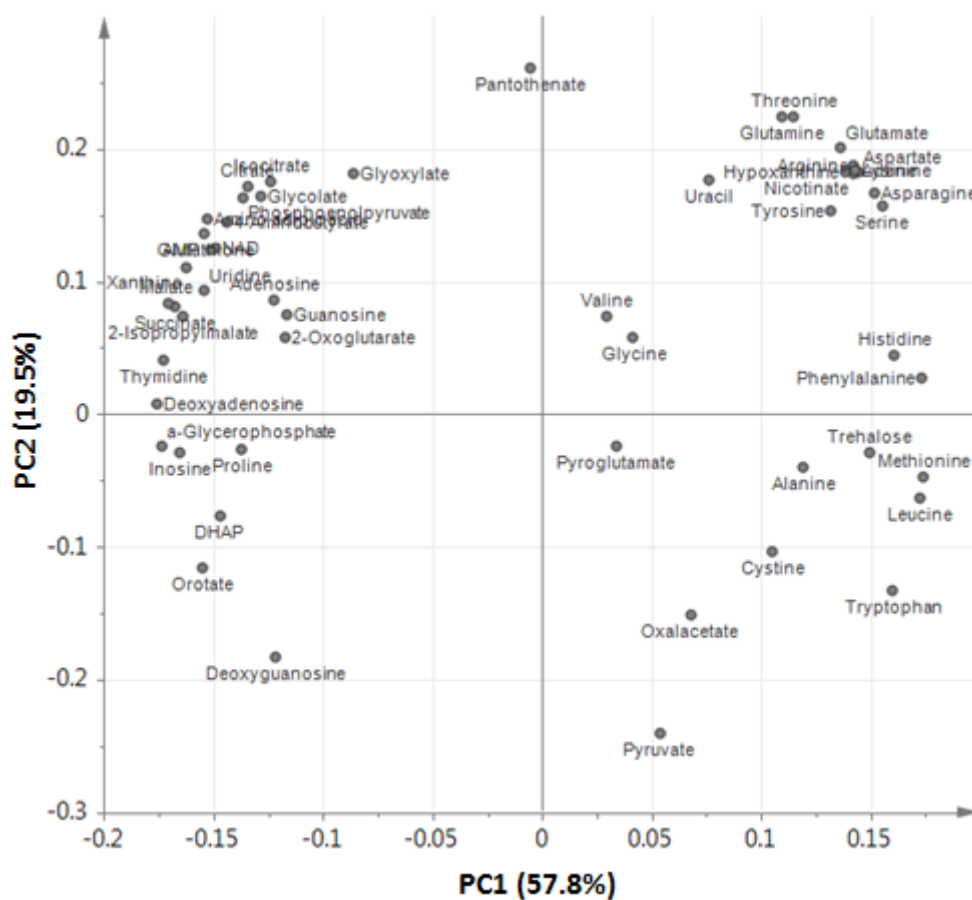

**Table S5.** Optimized multiple reaction monitoring (MRM) parameters and retention time for each metabolite.

| No | Metabolite | LC-MS Method */mode      | Precursor ion <i>m/z</i> | Product ion <i>m/z</i> | Retention Time (min) | Target Q1 Pre Bias (V) | Target Collision Energy (V) | Target Q3 Pre Bias (V) |
|----|------------|--------------------------|--------------------------|------------------------|----------------------|------------------------|-----------------------------|------------------------|
| 1  | Arginine   | Ion-pair RP/ESI negative | 173.10                   | 131.20                 | 1.039                | 13                     | 15                          | 24                     |
| 2  | Histidine  | Ion-pair RP/ESI negative | 154.00                   | 93.15                  | 1.038                | 12                     | 21                          | 16                     |
| 3  | Serine     | Ion-pair RP/ESI negative | 104.00                   | 74.15                  | 1.138                | 12                     | 16                          | 13                     |
| 4  | Asparagine | Ion-pair RP/ESI negative | 131.00                   | 113.15                 | 1.151                | 10                     | 15                          | 21                     |
| 5  | Glutamine  | Ion-pair RP/ESI negative | 145.00                   | 127.05                 | 1.160                | 12                     | 18                          | 18                     |

Table S5. Cont.

| No | Metabolite          | LC-MS Method<br>*/mode      | Precursor<br>ion <i>m/z</i> | Product<br>ion <i>m/z</i> | Retention<br>Time (min) | Target Q1 Pre<br>Bias (V) | Target<br>Collision<br>Energy (V) | Target Q3<br>Pre Bias (V) |
|----|---------------------|-----------------------------|-----------------------------|---------------------------|-------------------------|---------------------------|-----------------------------------|---------------------------|
| 6  | Threonine           | Ion-pair RP/ESI<br>negative | 118.00                      | 74.05                     | 1.186                   | 11                        | 15                                | 13                        |
| 7  | Trehalose           | Ion-pair RP/ESI<br>negative | 341.00                      | 89.00                     | 1.302                   | 15                        | 23                                | 16                        |
| 8  | Proline             | Ion-pair RP/ESI<br>negative | 114.00                      | 68.10                     | 1.331                   | 10                        | 15                                | 11                        |
| 9  | Methionine          | Ion-pair RP/ESI<br>negative | 148.00                      | 47.05                     | 1.987                   | 11                        | 14                                | 16                        |
| 10 | Isoleucine          | Ion-pair RP/ESI<br>negative | 130.10                      | 45.00                     | 2.578                   | 11                        | 15                                | 15                        |
| 11 | Adenine             | Ion-pair RP/ESI<br>negative | 134.05                      | 107.35                    | 2.829                   | 28                        | 20                                | 20                        |
| 12 | Tyrosine            | Ion-pair RP/ESI<br>negative | 180.00                      | 163.05                    | 2.834                   | 12                        | 18                                | 18                        |
| 13 | Xanthine            | Ion-pair RP/ESI<br>negative | 151.20                      | 108.15                    | 3.000                   | 16                        | 20                                | 19                        |
| 14 | Amino adipic acid   | Ion-pair RP/ESI<br>negative | 160.00                      | 116.20                    | 3.171                   | 12                        | 17                                | 21                        |
| 15 | Glutamate           | Ion-pair RP/ESI<br>negative | 146.00                      | 102.20                    | 3.273                   | 11                        | 15                                | 18                        |
| 16 | Aspartate           | Ion-pair RP/ESI<br>negative | 132.00                      | 88.05                     | 3.467                   | 10                        | 14                                | 15                        |
| 17 | Inosine             | Ion-pair RP/ESI<br>negative | 267.00                      | 135.15                    | 4.559                   | 21                        | 23                                | 24                        |
| 18 | Guanosine           | Ion-pair RP/ESI<br>negative | 282.10                      | 150.20                    | 4.706                   | 22                        | 21                                | 28                        |
| 19 | Phenylalanine       | Ion-pair RP/ESI<br>negative | 164.00                      | 103.15                    | 4.854                   | 13                        | 18                                | 19                        |
| 20 | Glycolate           | Ion-pair RP/ESI<br>negative | 75.00                       | 75.00                     | 5.001                   | 16                        | 15                                | 15                        |
| 21 | Glycerate           | Ion-pair RP/ESI<br>negative | 105.00                      | 75.15                     | 5.088                   | 12                        | 15                                | 26                        |
| 22 | Adenosine           | Ion-pair RP/ESI<br>negative | 266.10                      | 134.15                    | 5.385                   | 18                        | 20                                | 26                        |
| 23 | Glyoxylate          | Ion-pair RP/ESI<br>negative | 73.00                       | 73.00                     | 5.577                   | 14                        | 13                                | 15                        |
| 24 | Pyroglutamate       | Ion-pair RP/ESI<br>negative | 128.00                      | 84.10                     | 6.438                   | 10                        | 14                                | 15                        |
| 25 | Glucose 6-phosphate | Ion-pair RP/ESI<br>negative | 258.90                      | 97.05                     | 6.734                   | 20                        | 21                                | 17                        |



Table S5. Cont.

| No | Metabolite                   | LC-MS Method<br>*/mode      | Precursor<br>ion <i>m/z</i> | Product<br>ion <i>m/z</i> | Retention<br>Time (min) | Target Q1 Pre<br>Bias (V) | Target<br>Collision<br>Energy (V) | Target Q3<br>Pre Bias (V) |
|----|------------------------------|-----------------------------|-----------------------------|---------------------------|-------------------------|---------------------------|-----------------------------------|---------------------------|
| 26 | PIPES (Internal standard)    | Ion-pair RP/ESI<br>negative | 301.00                      | 193.25                    | 6.949                   | 12                        | 28                                | 21                        |
| 27 | Sedoheptulose<br>7-phosphate | Ion-pair RP/ESI<br>negative | 288.90                      | 97.10                     | 7.001                   | 23                        | 23                                | 17                        |
| 28 | Fructose 6-phosphate         | Ion-pair RP/ESI<br>negative | 258.90                      | 97.10                     | 7.058                   | 20                        | 15                                | 17                        |
| 29 | Ribose 5-phosphate           | Ion-pair RP/ESI<br>negative | 229.10                      | 96.95                     | 7.067                   | 18                        | 13                                | 18                        |
| 30 | Tryptophan                   | Ion-pair RP/ESI<br>negative | 203.10                      | 116.15                    | 7.070                   | 16                        | 18                                | 21                        |
| 31 | $\alpha$ -Glycerophosphate   | Ion-pair RP/ESI<br>negative | 171.10                      | 79.10                     | 7.226                   | 13                        | 16                                | 13                        |
| 32 | Glutathione                  | Ion-pair RP/ESI<br>negative | 305.90                      | 143.20                    | 7.536                   | 21                        | 19                                | 26                        |
| 33 | Ribulose 5-phosphate         | Ion-pair RP/ESI<br>negative | 229.00                      | 97.10                     | 7.767                   | 17                        | 13                                | 17                        |
| 34 | Orotate                      | Ion-pair RP/ESI<br>negative | 155.00                      | 111.15                    | 7.928                   | 12                        | 14                                | 20                        |
| 35 | CMP                          | Ion-pair RP/ESI<br>negative | 322.00                      | 79.10                     | 8.099                   | 25                        | 28                                | 13                        |
| 36 | Fructose 1-phosphate         | Ion-pair RP/ESI<br>negative | 258.90                      | 97.05                     | 8.102                   | 20                        | 21                                | 17                        |
| 37 | NAD                          | Ion-pair RP/ESI<br>negative | 662.10                      | 540.10                    | 8.281                   | 26                        | 18                                | 26                        |
| 38 | Pyruvate                     | Ion-pair RP/ESI<br>negative | 87.00                       | 43.05                     | 8.318                   | 10                        | 11                                | 14                        |
| 39 | DHAP                         | Ion-pair RP/ESI<br>negative | 168.90                      | 97.05                     | 8.608                   | 13                        | 12                                | 17                        |
| 40 | UMP                          | Ion-pair RP/ESI<br>negative | 322.90                      | 97.10                     | 8.815                   | 25                        | 24                                | 17                        |
| 41 | GMP                          | Ion-pair RP/ESI<br>negative | 362.00                      | 79.10                     | 8.995                   | 29                        | 28                                | 13                        |
| 42 | Oxalacetate                  | Ion-pair RP/ESI<br>negative | 131.00                      | 87.00                     | 9.310                   | 25                        | 11                                | 27                        |
| 43 | TMP                          | Ion-pair RP/ESI<br>negative | 321.00                      | 79.10                     | 9.719                   | 25                        | 38                                | 14                        |
| 44 | AMP                          | Ion-pair RP/ESI<br>negative | 346.00                      | 79.05                     | 9.811                   | 14                        | 32                                | 14                        |
| 45 | Nicotinate                   | Ion-pair RP/ESI<br>negative | 122.00                      | 78.15                     | 9.983                   | 14                        | 15                                | 13                        |

Table S5. Cont.

| No | Metabolite                | LC-MS Method<br>*/mode      | Precursor<br>ion <i>m/z</i> | Product<br>ion <i>m/z</i> | Retention<br>Time (min) | Target Q1 Pre<br>Bias (V) | Target<br>Collision<br>Energy (V) | Target Q3<br>Pre Bias (V) |
|----|---------------------------|-----------------------------|-----------------------------|---------------------------|-------------------------|---------------------------|-----------------------------------|---------------------------|
| 46 | Pantothenate              | Ion-pair RP/ESI<br>negative | 218.00                      | 88.00                     | 10.022                  | 21                        | 14                                | 16                        |
| 47 | Succinate                 | Ion-pair RP/ESI<br>negative | 117.00                      | 73.20                     | 10.155                  | 13                        | 15                                | 12                        |
| 48 | Fumarate                  | Ion-pair RP/ESI<br>negative | 115.00                      | 71.10                     | 10.278                  | 13                        | 10                                | 12                        |
| 49 | cAMP                      | Ion-pair RP/ESI<br>negative | 328.00                      | 134.10                    | 10.465                  | 15                        | 27                                | 24                        |
| 50 | Malate                    | Ion-pair RP/ESI<br>negative | 132.90                      | 115.20                    | 10.578                  | 10                        | 17                                | 21                        |
| 51 | UDP-glucose               | Ion-pair RP/ESI<br>negative | 564.80                      | 323.10                    | 10.712                  | 24                        | 26                                | 15                        |
| 52 | 2-Oxoglutarate            | Ion-pair RP/ESI<br>negative | 145.00                      | 101.20                    | 10.745                  | 11                        | 13                                | 18                        |
| 53 | CDP                       | Ion-pair RP/ESI<br>negative | 401.80                      | 79.05                     | 10.753                  | 16                        | 43                                | 13                        |
| 54 | UDP                       | Ion-pair RP/ESI<br>negative | 402.90                      | 79.05                     | 10.807                  | 16                        | 48                                | 13                        |
| 55 | NADP                      | Ion-pair RP/ESI<br>negative | 741.80                      | 620.10                    | 10.811                  | 26                        | 18                                | 30                        |
| 56 | 3Phosphoglycerate         | Ion-pair RP/ESI<br>negative | 184.90                      | 97.05                     | 10.829                  | 14                        | 16                                | 17                        |
| 57 | Fructose 2,6-bisphosphate | Ion-pair RP/ESI<br>negative | 338.90                      | 241.15                    | 10.834                  | 26                        | 19                                | 27                        |
| 58 | Fructose 1,6-bisphosphate | Ion-pair RP/ESI<br>negative | 338.90                      | 97.10                     | 10.838                  | 26                        | 22                                | 17                        |
| 59 | NADH                      | Ion-pair RP/ESI<br>negative | 664.00                      | 78.95                     | 10.876                  | 24                        | 57                                | 13                        |
| 60 | Isocitrate                | Ion-pair RP/ESI<br>negative | 190.90                      | 73.20                     | 10.891                  | 13                        | 22                                | 26                        |
| 61 | Citrate                   | Ion-pair RP/ESI<br>negative | 190.90                      | 87.00                     | 10.892                  | 13                        | 18                                | 14                        |
| 62 | ADP                       | Ion-pair RP/ESI<br>negative | 425.90                      | 79.10                     | 10.913                  | 17                        | 47                                | 13                        |
| 63 | Bisphosphoglycerate       | Ion-pair RP/ESI<br>negative | 265.00                      | 167.15                    | 10.919                  | 11                        | 18                                | 29                        |
| 64 | Phosphoenolpyruvate       | Ion-pair RP/ESI<br>negative | 167.00                      | 78.95                     | 10.928                  | 15                        | 13                                | 13                        |
| 65 | 2-Isopropylmalate         | Ion-pair RP/ESI<br>negative | 175.00                      | 115.20                    | 10.998                  | 13                        | 16                                | 21                        |

Table S5. Cont.

| No | Metabolite           | LC-MS Method<br>*/mode      | Precursor<br>ion <i>m/z</i> | Product<br>ion <i>m/z</i> | Retention<br>Time (min) | Target Q1 Pre<br>Bias (V) | Target<br>Collision<br>Energy (V) | Target Q3<br>Pre Bias (V) |
|----|----------------------|-----------------------------|-----------------------------|---------------------------|-------------------------|---------------------------|-----------------------------------|---------------------------|
| 66 | FAD                  | Ion-pair RP/ESI<br>negative | 783.90                      | 97.10                     | 11.155                  | 20                        | 51                                | 17                        |
| 67 | CTP                  | Ion-pair RP/ESI<br>negative | 481.90                      | 159.10                    | 11.171                  | 19                        | 36                                | 29                        |
| 68 | GTP                  | Ion-pair RP/ESI<br>negative | 521.90                      | 159.05                    | 11.185                  | 20                        | 32                                | 29                        |
| 69 | NADPH                | Ion-pair RP/ESI<br>negative | 744.00                      | 159.00                    | 11.201                  | 26                        | 60                                | 30                        |
| 70 | UTP                  | Ion-pair RP/ESI<br>negative | 482.90                      | 159.10                    | 11.206                  | 19                        | 36                                | 29                        |
| 71 | ATP                  | Ion-pair RP/ESI<br>negative | 505.90                      | 159.10                    | 11.226                  | 20                        | 35                                | 29                        |
| 72 | Acetyl-coA           | Ion-pair RP/ESI<br>negative | 808.00                      | 408.00                    | 11.382                  | 20                        | 37                                | 28                        |
| 73 | Cystine              | RP/ESI positive             | 241.05                      | 74.00                     | 1.349                   | -25                       | -40                               | -14                       |
| 74 | Hydroxyproline       | RP/ESI positive             | 131.70                      | 85.95                     | 1.437                   | -30                       | -19                               | -14                       |
| 75 | Cysteine             | RP/ESI positive             | 122.00                      | 59.00                     | 1.482                   | -29                       | -40                               | -13                       |
| 76 | Homoserine           | RP/ESI positive             | 119.70                      | 74.15                     | 1.514                   | -30                       | -15                               | -12                       |
| 77 | Alanine              | RP/ESI positive             | 90.05                       | 44.05                     | 1.563                   | -16                       | -20                               | -19                       |
| 78 | Citrulline           | RP/ESI positive             | 175.60                      | 70.00                     | 1.572                   | -30                       | -30                               | -30                       |
| 79 | Ornithine            | RP/ESI positive             | 132.70                      | 69.75                     | 1.721                   | -30                       | -30                               | -30                       |
| 80 | Lysine               | RP/ESI positive             | 146.70                      | 83.95                     | 1.783                   | -30                       | -25                               | -13                       |
| 81 | b-Alanine            | RP/ESI positive             | 89.90                       | 30.15                     | 1.850                   | -14                       | -15                               | -30                       |
| 82 | Uracil               | RP/ESI positive             | 113.15                      | 70.05                     | 2.278                   | -19                       | -43                               | -29                       |
| 83 | 4-Aminobutyrate      | RP/ESI positive             | 103.70                      | 87.05                     | 2.302                   | -30                       | -16                               | -15                       |
| 84 | Putrescine           | RP/ESI positive             | 88.80                       | 71.70                     | 2.375                   | -30                       | -20                               | -30                       |
| 85 | Glycine              | RP/ESI positive             | 118.05                      | 43.05                     | 2.829                   | -17                       | -40                               | -13                       |
| 86 | Valine               | RP/ESI positive             | 118.10                      | 72.10                     | 2.857                   | -19                       | -10                               | -29                       |
| 87 | Spermidine           | RP/ESI positive             | 145.70                      | 72.20                     | 3.130                   | -30                       | -20                               | -30                       |
| 88 | Hypoxanthine         | RP/ESI positive             | 137.05                      | 55.05                     | 3.236                   | -21                       | -40                               | -28                       |
| 89 | Uridine              | RP/ESI positive             | 244.90                      | 113.05                    | 3.322                   | -27                       | -10                               | -15                       |
| 90 | Guanine              | RP/ESI positive             | 151.95                      | 135.05                    | 3.619                   | -29                       | -20                               | -16                       |
| 91 | S-Adenosylmethionine | RP/ESI positive             | 398.50                      | 250.20                    | 3.632                   | -30                       | -17                               | -25                       |
| 92 | Cytidine             | RP/ESI positive             | 244.00                      | 112.05                    | 4.224                   | -16                       | -20                               | -16                       |
| 93 | Deoxycytidine        | RP/ESI positive             | 228.10                      | 112.10                    | 5.629                   | -25                       | -10                               | -24                       |
| 94 | Leucine              | RP/ESI positive             | 131.70                      | 43.05                     | 6.203                   | -30                       | -25                               | -17                       |
| 95 | Deoxyguanosine       | RP/ESI positive             | 268.00                      | 152.00                    | 6.222                   | -18                       | -10                               | -15                       |
| 96 | Thymidine            | RP/ESI positive             | 243.10                      | 127.05                    | 6.436                   | -27                       | -10                               | -29                       |
| 97 | Deoxyadenosine       | RP/ESI positive             | 252.10                      | 136.10                    | 6.890                   | -17                       | -20                               | -27                       |

\*RP: reversed phase.
